# Supplementary material
Source: PubMed Central journal article supplement (PMC6037153)
Supplement: mmc1.pdf [file mmc1.pdf]

**Biophysical Journal, Volume 115**

**Supplemental Information**

**The Structural Properties in Solution of the Intrinsically Mixed Folded  
Protein Ataxin-3**

**Alessandro Sicorello, Geoff Kelly, Alain Oregioni, Jiří Nováček, Vladimír Sklenář, and Annalisa Pastore**

## Supplemental Information

**Table S1** – List of  $^{15}\text{N}$ - $^1\text{H}$  amino acid selective labelling schemes in association with wild-type or ataxin-3(Q13) mutants. All the resonances of residues of wild-type ataxin-3(Q13) (indicated as Wt) that could be detected and assigned are listed. The residues assigned via a combination of selective amino acid labelling and inspection of the HNCACB spectrum are highlighted in bold. Only the resonances of residues of mutants whose assignment was achieved by analysis of chemical shift perturbation with respect to the spectrum of the wild-type protein are shown.

| $^{15}\text{N}$ -aa  | Mutant | Detected and assigned                                                                                                                                                        | Comments                                                                                                                                                      |
|----------------------|--------|------------------------------------------------------------------------------------------------------------------------------------------------------------------------------|---------------------------------------------------------------------------------------------------------------------------------------------------------------|
| $^{15}\text{N}$ -Arg | Wt     | <b>R203</b> , R211, <b>R231</b> , <b>R237</b> ,<br><b>R251</b> , <b>R262</b> , <b>R282</b> , <b>R284</b> ,<br><b>R285</b> , <b>R318</b> , R352                               | R188 could not be assigned unequivocally. There is potential candidate resonance                                                                              |
|                      | R282H  | R282, R284, R285                                                                                                                                                             |                                                                                                                                                               |
|                      | R284H  | R282, R284, R285                                                                                                                                                             |                                                                                                                                                               |
|                      | Wt     | <b>L191</b> , <b>L196</b> , L199, L209,<br>L213, L222, L229, L233,<br>L235, L249, <b>L255</b> , L276,<br><b>L281</b> , L308, L326, L330,<br>L340, L348, L355                 |                                                                                                                                                               |
| $^{15}\text{N}$ -Leu | L191H  | L191, L196, L199                                                                                                                                                             |                                                                                                                                                               |
|                      | S256A  | L255                                                                                                                                                                         |                                                                                                                                                               |
|                      | R282H  | L281                                                                                                                                                                         |                                                                                                                                                               |
| $^{15}\text{N}$ -Ile | Wt     | I240, I253, I264                                                                                                                                                             | The NH resonances of I192 not detected in the $^{15}\text{N}$ -Ile HSQC spectrum                                                                              |
| $^{15}\text{N}$ -Val | Wt     | V183, V204, V212, V344,<br>V351                                                                                                                                              |                                                                                                                                                               |
| $^{15}\text{N}$ -Glu | Wt     | <b>E194</b> , <b>E195</b> , <b>E210</b> , E214,<br>E224, E226, E227, E239,<br>E243, E245, E246, <b>E279</b> ,<br><b>E280</b> , <b>E286</b> , E317, E336,<br>E337, E349, E358 | NH resonances of E201 and E290 not identified                                                                                                                 |
|                      | Wt     | Q198, <b>Q202</b> , Q230, <b>Q238</b> ,<br><b>Q254</b> , <b>Q258</b> , Q266, Q270,<br>Q298, Q299, Q300, Q301,<br>Q302, Q303, Q304, Q305,<br>Q311, Q341                       | NH resonances of Q184 and Q185 not identified                                                                                                                 |
| $^{15}\text{N}$ -Gln | T207A  | Q202                                                                                                                                                                         |                                                                                                                                                               |
|                      | S256A  | Q254, S258                                                                                                                                                                   |                                                                                                                                                               |
|                      | R284H  |                                                                                                                                                                              | The NH resonances of Q292, Q293, Q294, Q296, Q297 were identified but sequential assignment was impeded by overlap in the CACB plane of the HNCACB experiment |
| $^{15}\text{N}$ -Ala | Wt     | <b>A197</b> , A215, <b>A232</b> , A234,<br>A247, <b>A252</b> , <b>A287</b> , A320,<br>A325, A333, A342, A343                                                                 |                                                                                                                                                               |
|                      | L191H  | A197                                                                                                                                                                         |                                                                                                                                                               |

|                     |       |                                                    |                                                                                                                                                                                   |
|---------------------|-------|----------------------------------------------------|-----------------------------------------------------------------------------------------------------------------------------------------------------------------------------------|
|                     | D228E | A232                                               | The NH resonances of A232 and A252 were close but distinguishable in the HSQC spectrum. Their $C\alpha_i/C\alpha_{i-1}$ and $C\beta_i/C\beta_{i-1}$ resonances overlap completely |
|                     | S256A | A252                                               |                                                                                                                                                                                   |
|                     | R282H | A287                                               |                                                                                                                                                                                   |
| <sup>15</sup> N-Met | Wt    | M221, M242, <b>M257</b> , M268, M334, M339, M346   | M186 could not be detected                                                                                                                                                        |
|                     | L191I |                                                    | No chemical shift perturbations observed as referred to the spectrum of the wt protein                                                                                            |
|                     | S260A | M257                                               |                                                                                                                                                                                   |
| <sup>15</sup> N-His | Wt    | <b>H187</b> , H314                                 | The HN resonance of H205 not detected                                                                                                                                             |
|                     | T207A |                                                    | No chemical shift perturbation observed with respect to the spectrum of the wt protein                                                                                            |
| <sup>15</sup> N-Lys | Wt    | K200, <b>K206</b> , <b>K283</b> , K356, K360, K361 | NH resonance of K190 not detected<br>K291, K295: NH resonances not assigned because of the low resolution in the C plane of the HNCACB.                                           |
|                     | R282H | K283                                               |                                                                                                                                                                                   |
| <sup>15</sup> N-Tyr | Wt    | <b>Y288</b>                                        |                                                                                                                                                                                   |
| <sup>15</sup> N-Phe | Wt    | <b>F289</b>                                        |                                                                                                                                                                                   |

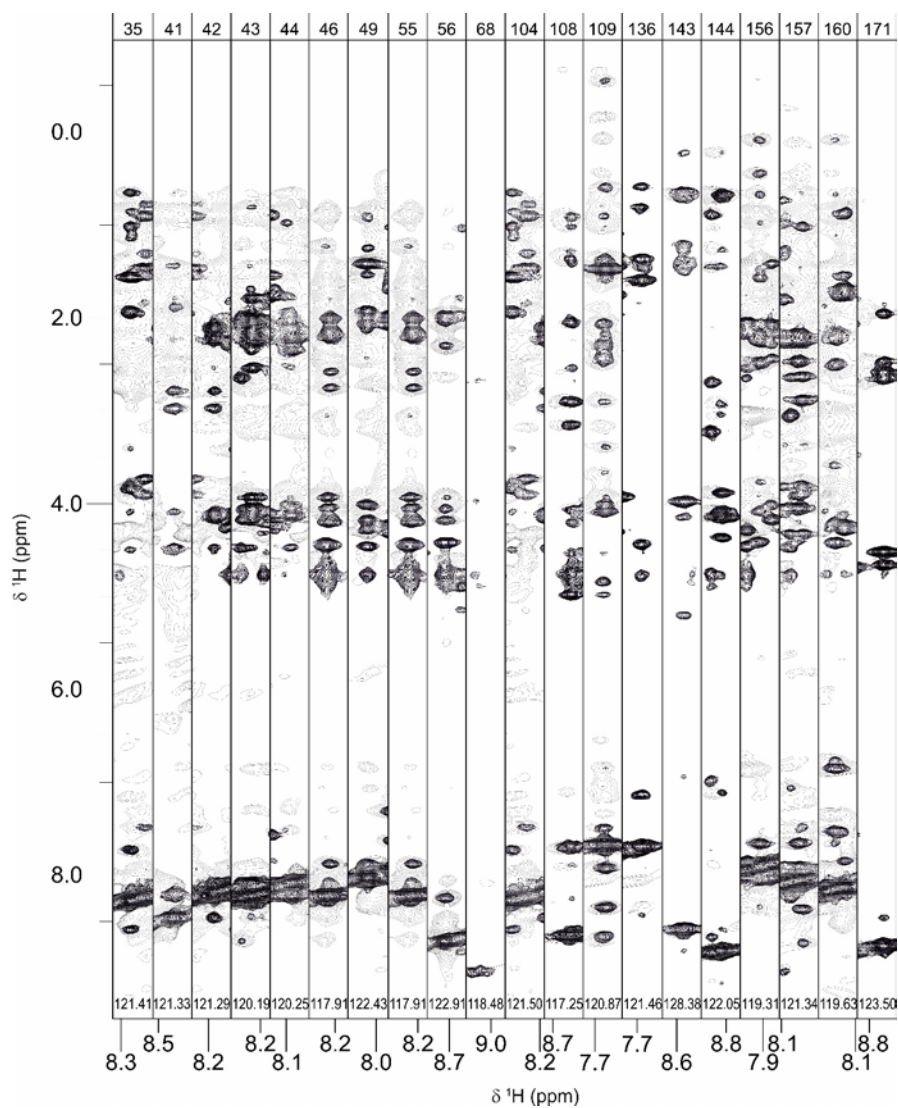

**Figure S1 - NOESY-HSQC strips of josephin and ataxin-3(Q13).** The strips show the H-H correlations to the HSQC resonances of josephin residues (top) that were assigned exclusively through the comparison of the spectrum of the isolated josephin domain (black) and of ataxin-3(Q13) (grey).

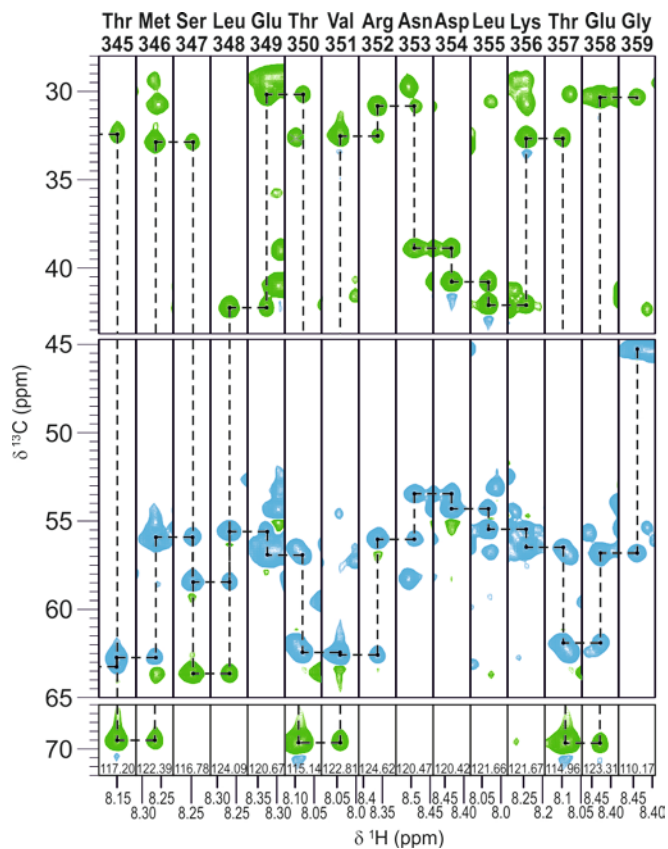

**Figure S2** - Representative  $^{13}\text{C}$ - $^1\text{H}$  strips of a HNCACB experiment of ataxin-3(Q13) (residues 343-359). The  $\beta$ -carbons are coloured in green, the  $\alpha$ -carbons in light blue. The correlated resonances used for the sequential assignment are connected by dashed lines.

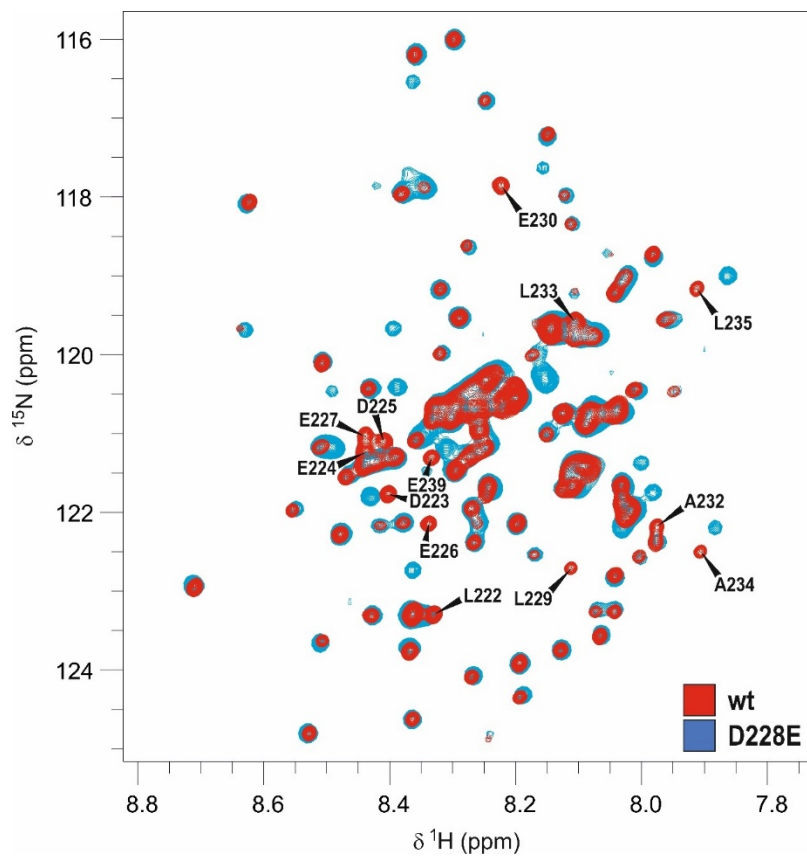

**Figure S3** – Overlay of the central region of the  $^{15}\text{N}$ - $^1\text{H}$  HSQC spectra of uniformly  $^{15}\text{N}$  labelled wild-type ataxin-3(Q13) (red) and mutant D228E (blue). The counter level was adjusted to simplify the spectral complexity and highlight most of the resonances perturbed by the mutation.

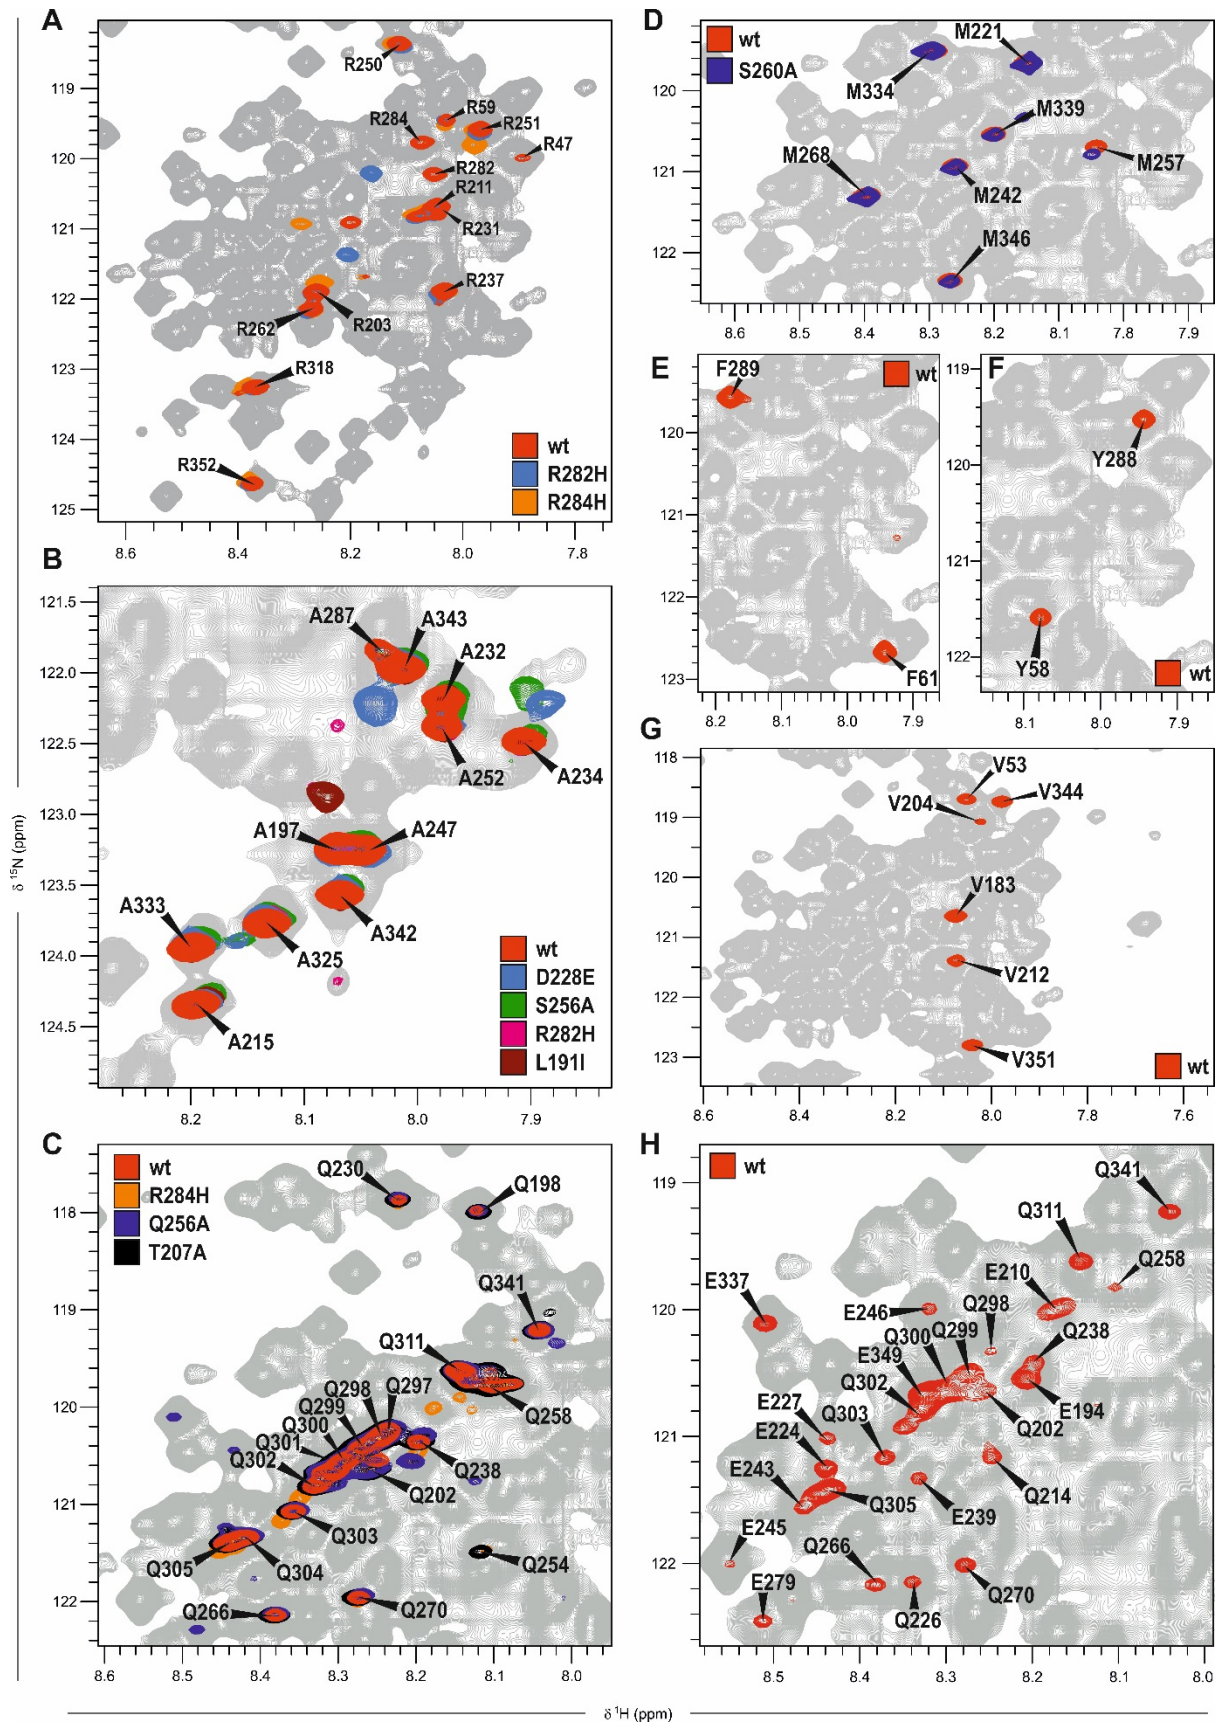

**Figure S4** – Examples of  $^{15}\text{N}$  selective amino acid labelling of wild-type and mutated ataxin-3(Q13). A:  $^{15}\text{N}$ -arginine, B:  $^{15}\text{N}$ -alanine, C:  $^{15}\text{N}$ -glutamine, D:  $^{15}\text{N}$ -methionine, E:  $^{15}\text{N}$ -phenylalanine, F:  $^{15}\text{N}$ -tyrosine, G:  $^{15}\text{N}$ -valine, H:  $^{15}\text{N}$ -glutamate.

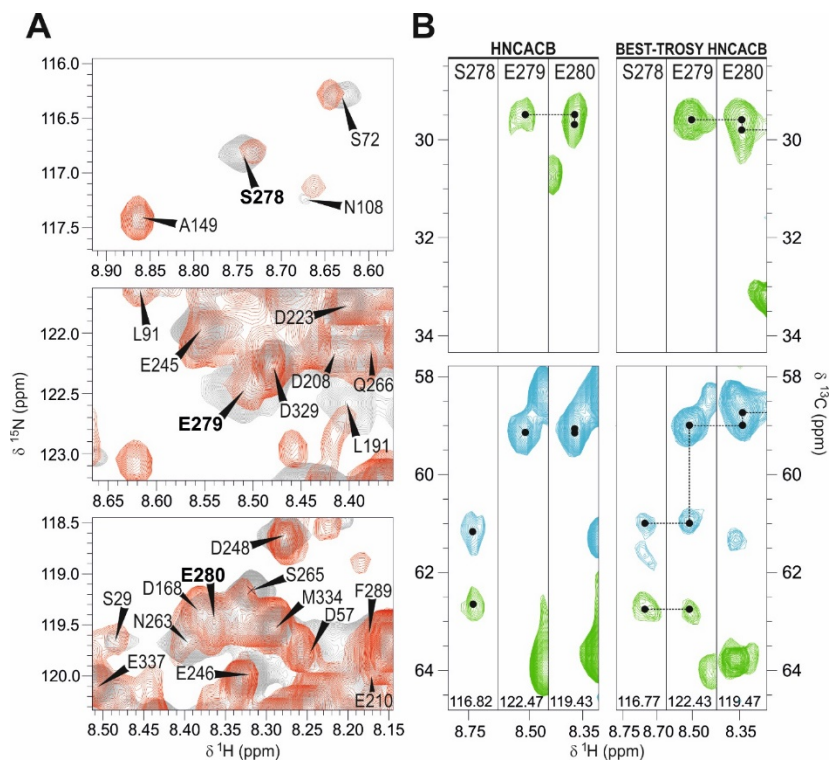

**Figure S5** – Sequential assignment of residues of residues 278-280 using BEST-TROSY HNCACB. A: Areas of the  $^1\text{H}$ - $^{15}\text{N}$  BEST-TROSY HSQC (red) and conventional  $^1\text{H}$ - $^{15}\text{N}$  HSQC (grey) of ataxin-3(Q13) containing residues S278, E279, E280 (bold). B: CH strips of the HNCACB and BEST-TROSY HNCACB spectra associated with S278, E279 and E280 ( $\text{C}\alpha$ : light blue,  $\text{C}\beta$ : green).



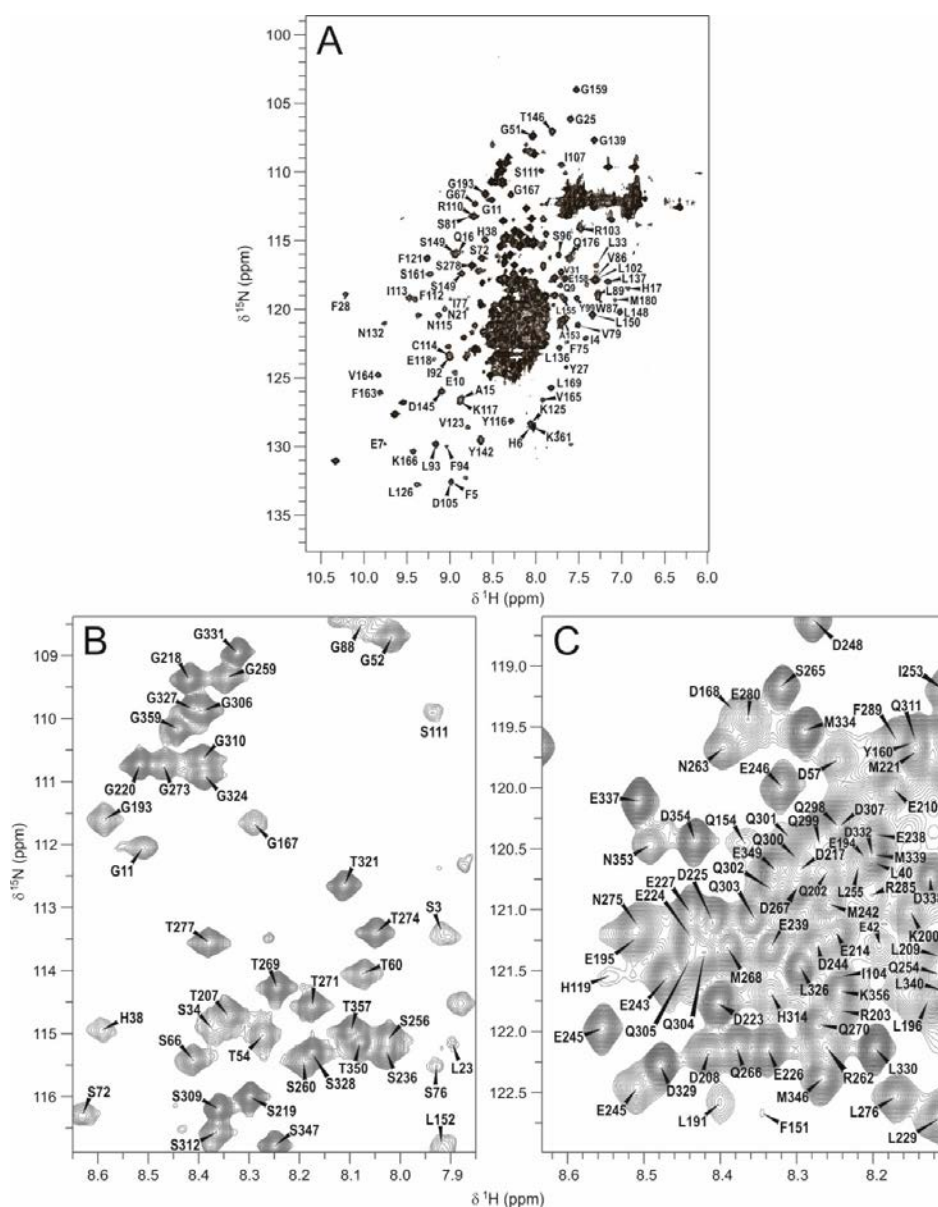

**Figure S6** –  $^1\text{H}$ - $^{15}\text{N}$  HSQC spectrum of ataxin-3 and assignment of the NH resonances. A) Spectrum of ataxin-3(Q13) with the assignment of the well resolved resonances. B) Close-up of the poorly dispersed area containing glycines, threonines and serines. C) Close-up of the area containing glutamines within the polyQ tract that could be assigned, alongside with some poorly dispersed UIM residues.
